# Supplementary material for: Unveiling hidden epitaxial interfaces in novel SnO2/Zn2SnO4 core–shell nanowires with a multi-domain shield via cross-sectional transmission electron microscopy
Source: Royal Society of Chemistry journal article supplement (doi:10.1039/c8ce02092b), 2019-01-01
Supplement: c8ce02092b1.pdf [file c8ce02092b1.pdf]

Supporting Information

# Unveiling Hidden Epitaxial Interfaces in Novel SnO<sub>2</sub>/Zn<sub>2</sub>SnO<sub>4</sub> Core-shell nanowires with a Multi-domain Shield via Cross-sectional Transmission Electron Microscopy

*Bojia Xu<sup>a</sup>, Baobao Cao<sup>a\*</sup>*

<sup>a</sup>School of Materials Science and Engineering, Southwest Jiaotong University,  
Chengdu, People's Republic of China.

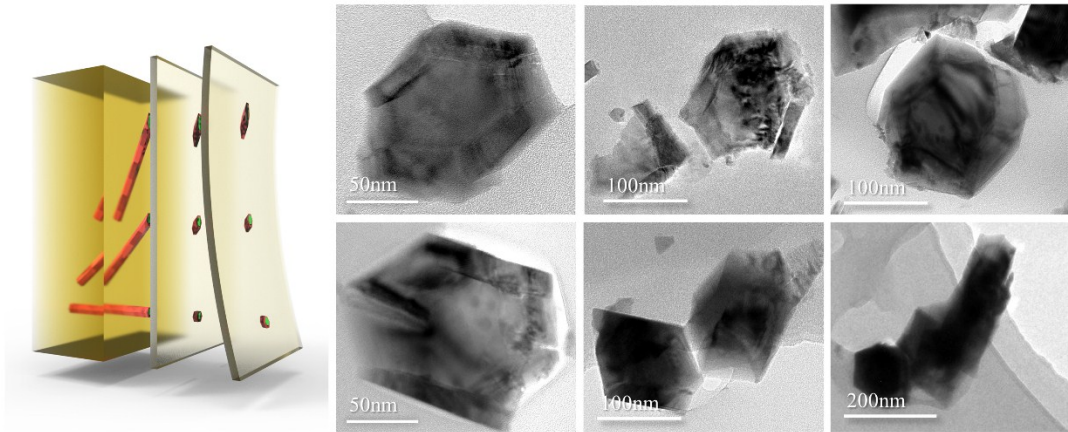

**Figure S1.** The embedded nanowires with different orientation, among which core-shell nanowire cross sections with quasi-hexagonal shape are noticed.

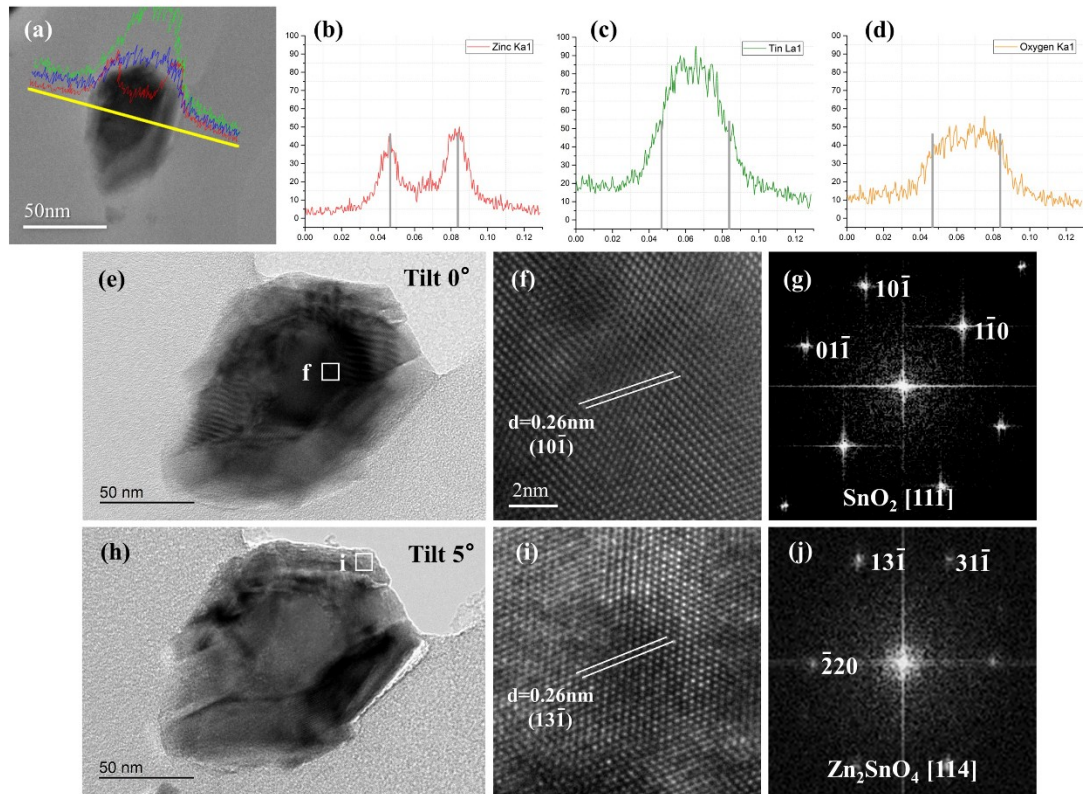

**Figure S2.** (a-d) EDS analysis of the cross-section sample shows the Zn-enriched shell and Sn-enriched Core; (e) Cross-section sample that the core crystal is in the main zone axis. (f) HRTEM image of the core that marked in (e); (g) Corresponding FFT pattern shows the zone axis of core is  $[111]_{\text{rutile}}$ ; (h) The same cross-section sample that the shell crystal is in the main zone axis. (i) HRTEM image of the shell that marked in (h); (j) Corresponding FFT pattern shows the zone axis of shell is  $[114]_{\text{spinel}}$ .

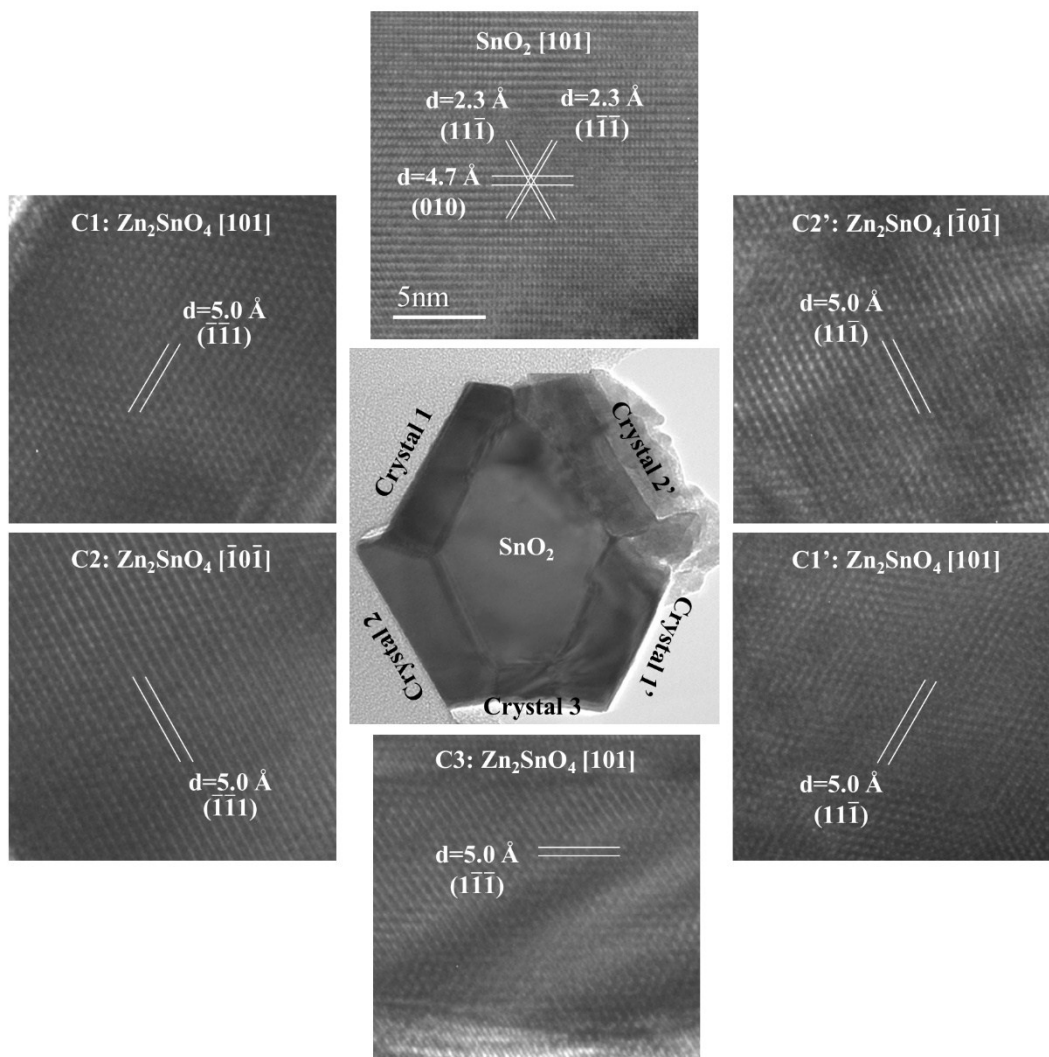

**Figure S3.** HRTEM images of each crystal that form the core-shell structure.

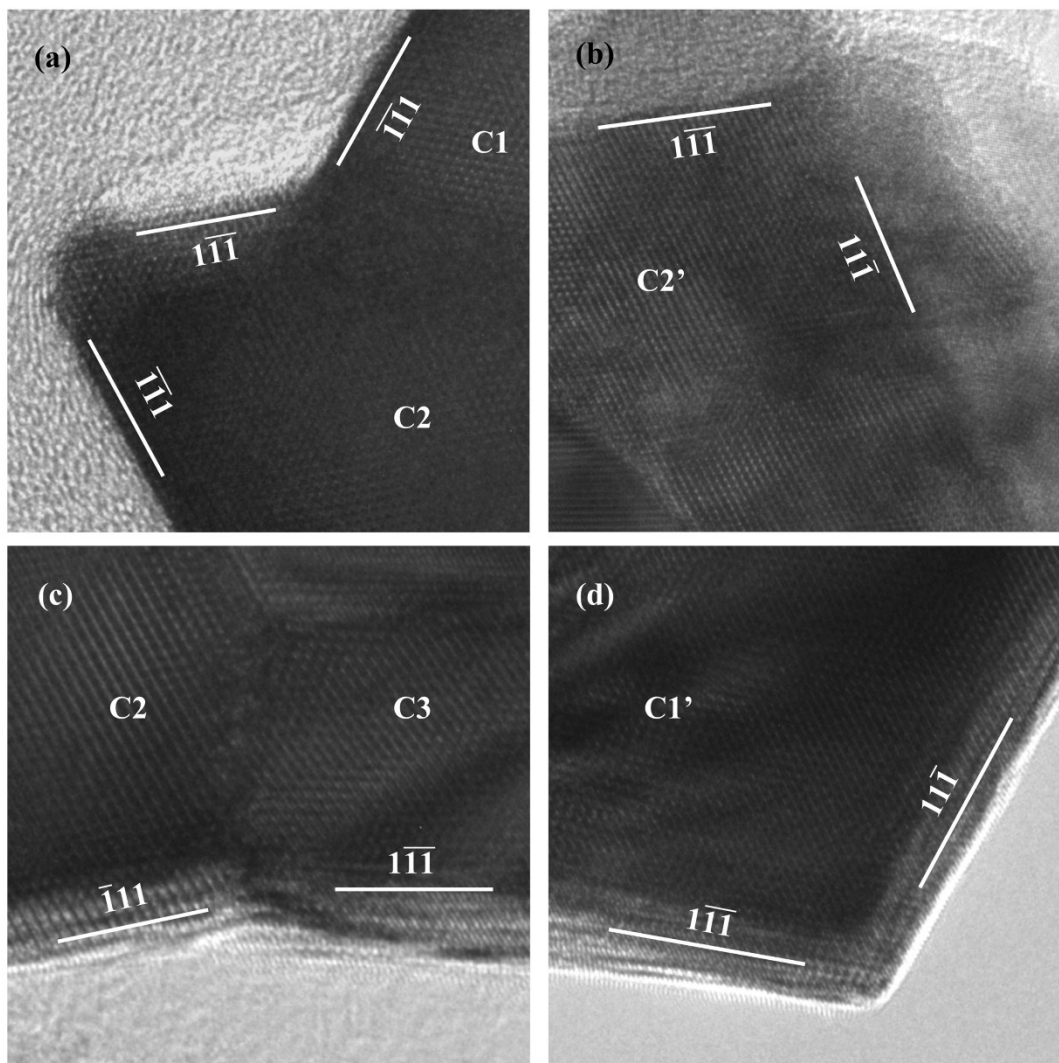

**Figure S4.** All Zn<sub>2</sub>SnO<sub>4</sub> shell domains expose their {111} plane.
